# Supplementary material for: Electrospinning of PCL-Based Blends: Processing Optimization for Their Scalable Production
Source: MDPI journal article supplement (doi:10.3390/ma13173853), 2020-09-01
Supplement: s1 [file s1]

*Supplementary*

# Electrospinning of PCL-Based Blends: Processing Optimization for their Scalable Production

**Marina P. Arrieta <sup>1,2</sup>, Adrián Leonés Gil <sup>1,3</sup>, Maysa Yusef <sup>1</sup>, José M. Kenny <sup>1,4</sup> and Laura Peponi <sup>1,3,\*</sup>**

<sup>1</sup> Instituto de Ciencia y Tecnología de Polímeros (ICTP-CSIC), C/Juan de la Cierva 3, 28006 Madrid, Spain; marrie06@ucm.es (M.P.A.); aleones@ictp.csic.es (A.L.G.); maysay.b@hotmail.es (M.Y.); jose.kenny@unipg.it (J.M.K.)

<sup>2</sup> Facultad de Óptica y Optometría, Universidad Complutense de Madrid (UCM), Arcos de Jalón 118, 28037 Madrid, Spain

<sup>3</sup> Interdisciplinary Platform for Sustainable Plastics Towards a Circular Economy-Spanish National Research Council (SusPlast-CSIC), 28006 Madrid, Spain

<sup>4</sup> Civil and Environmental Engineering Department, STM Group, University of Perugia, 05100 Terni, Italy

\* Correspondence: lpeponi@ictp.csic.es

Received: 30 July 2020; Accepted: 28 August 2020; Published: date

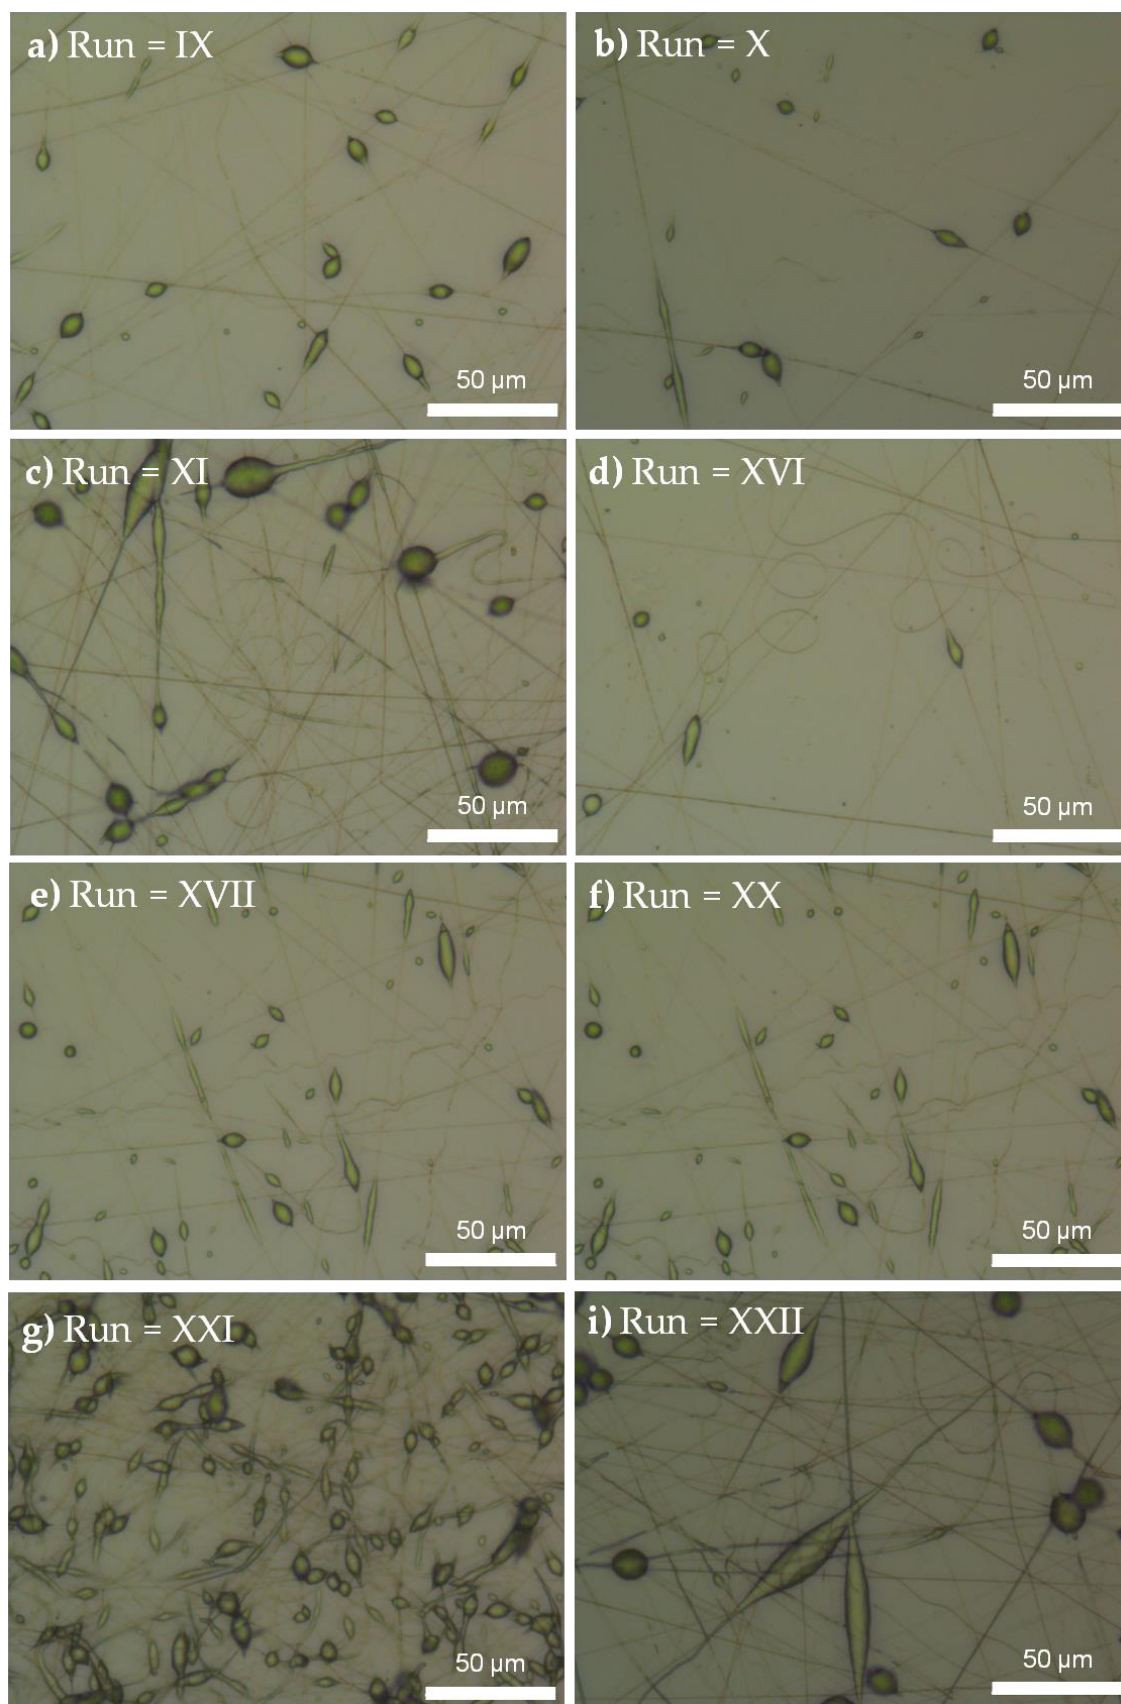

**Figure S1.** Optical microscopy images at 100 × of electrospun PCL fibers of the different run of Table 2 where the beads formation is reported. (a) Run IX, (b) Run X, (c) Run XI, (d) Run XVI, (e) Run XVII, (f) Run XX, (g) Run XXI and (h) Run = XXII.

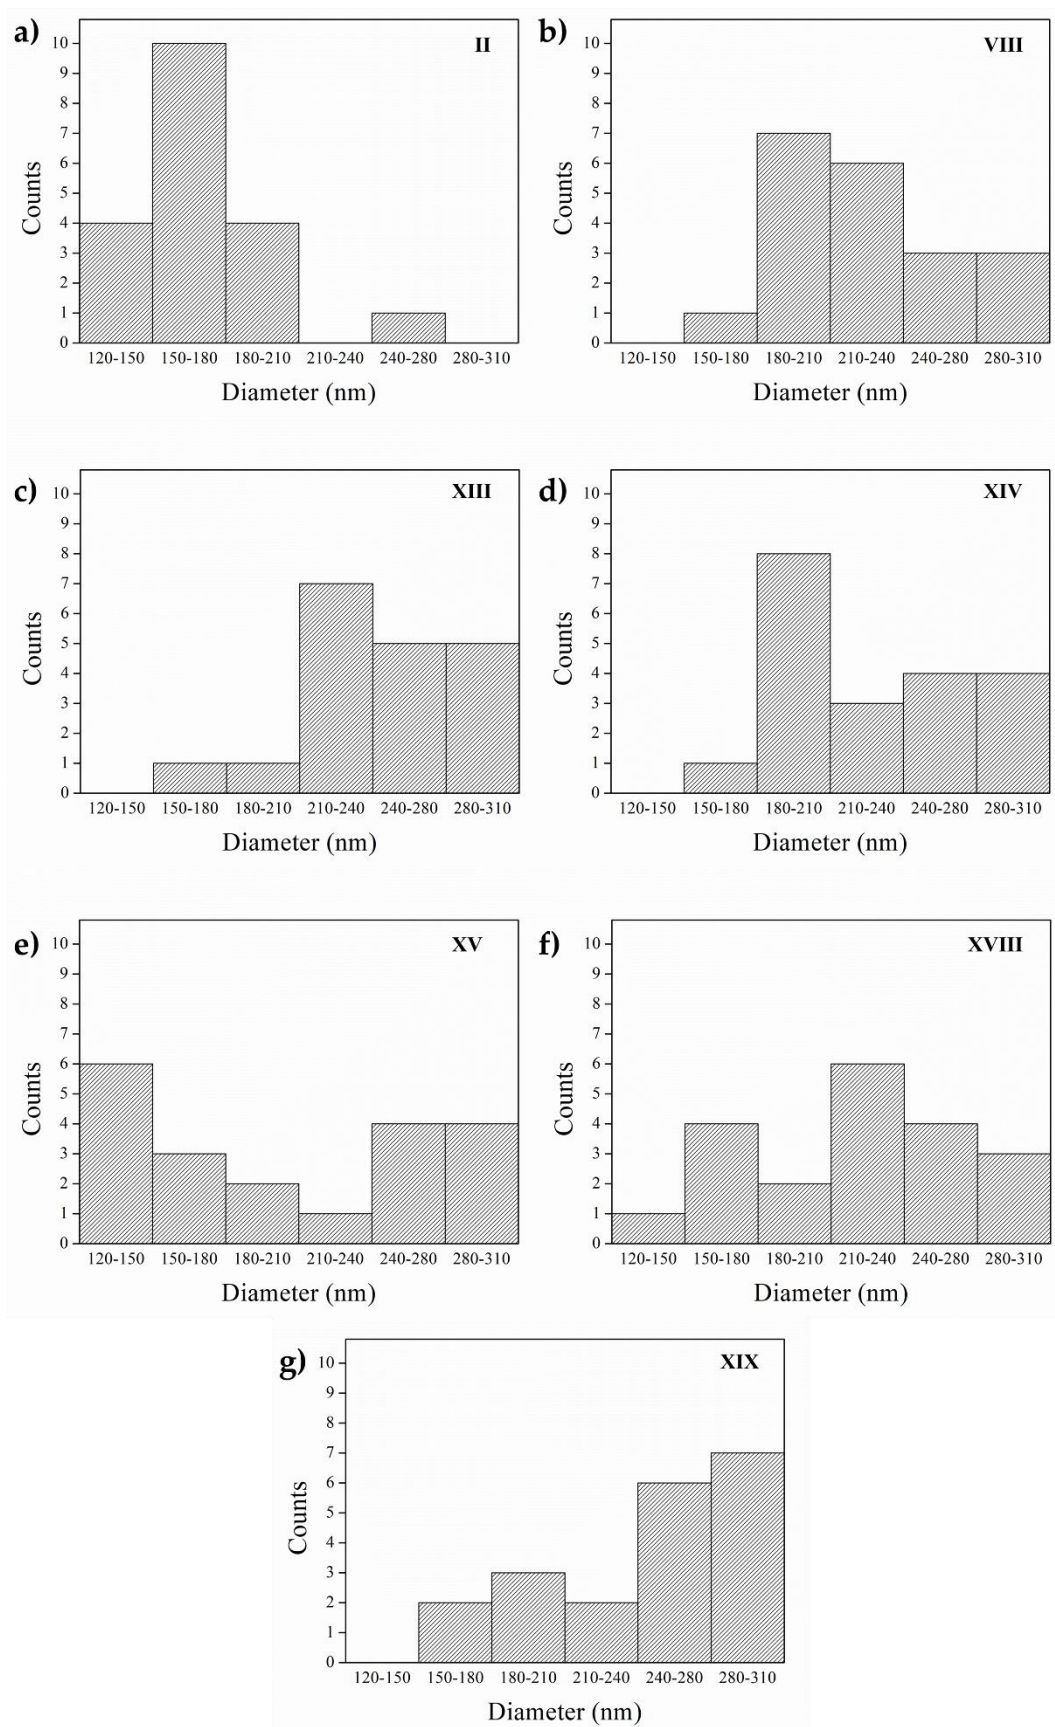

Figure S2. Fiber diameter distribution of the formulation of Table 2.

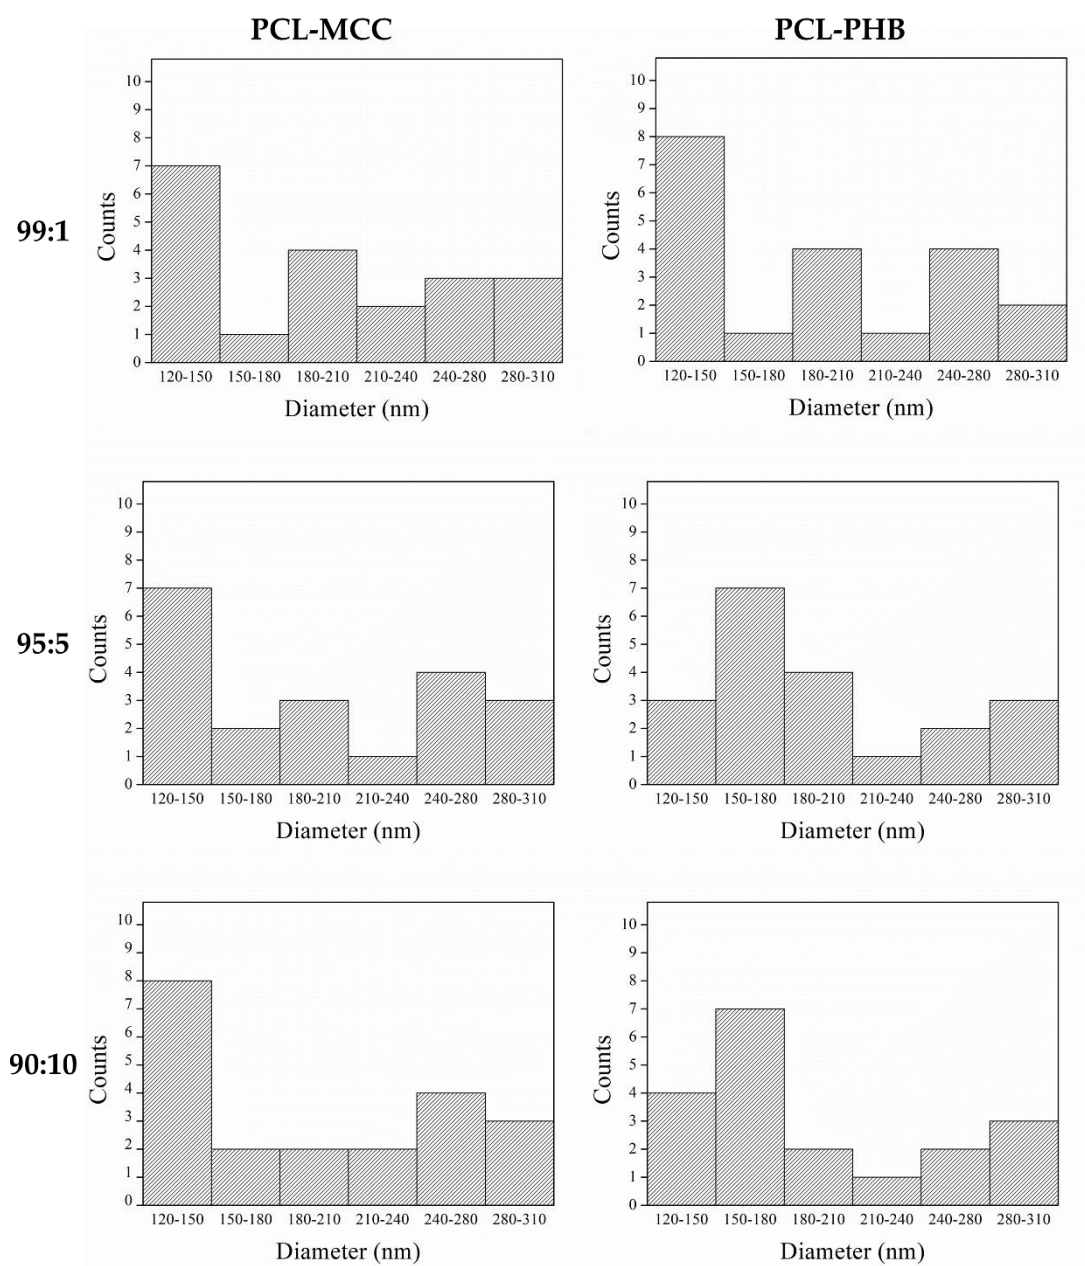

**Figure S3.** The corresponding fiber size distribution of the blend formulations.



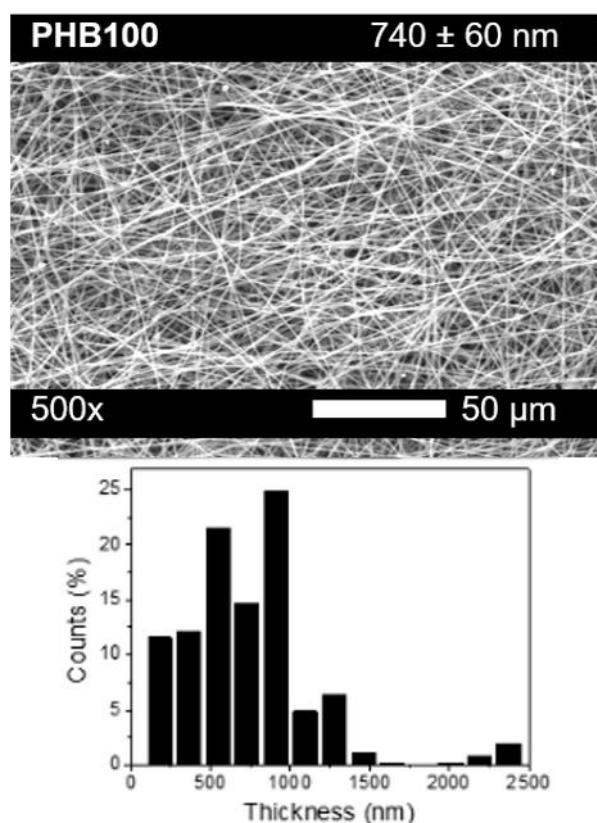

**Figure S4.** Neat PHB fibers obtaining by electrospinning and their fiber size distribution.

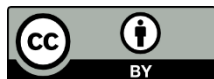

© 2020 by the authors. Submitted for possible open access publication under the terms and conditions of the Creative Commons Attribution (CC BY) license (<http://creativecommons.org/licenses/by/4.0/>).
